# Supplementary material for: Barriers for pregnant women living in rural, agricultural villages to accessing antenatal care in Cambodia: A community-based cross-sectional study combined with a geographic information system
Source: PLoS One. 2018 Mar 19;13(3):e0194103. doi: 10.1371/journal.pone.0194103 (PMC5858830; doi:10.1371/journal.pone.0194103)
Supplement: S2 File — (XLSX) [file pone.0194103.s002.xlsx]

## Sheet: Sheet1
villagecode	actual	straight	difference
1	1.5	1.5	0
2	8.45	6.76	1.69
3	2.78	1.4	1.38
5	24.77	17.83	6.94
6	6.76	6.44	0.32
7	14.73	8.83	5.9
8	9.08	5.67	3.41
9	7.59	4.72	2.87
10	10.97	7.25	3.72
11	10.77	8.49	2.28
12	13.03	7.4	5.63
13	10.4	8.08	2.32
14	6.92	6.47	0.45
15	11.19	5.88	5.31
16	5.6	4.76	0.84
17	9.38	7.59	1.79
18	10.51	8.62	1.89
19	14.62	14.25	0.37
20	14.82	12.82	2
21	29.13	18.72	10.41
22	34.45	23.79	10.67
23	21.01	17.14	3.87
24	14.31	10.89	3.41
25	21.11	15.1	6
26	53.1	22.87	30.23
27	8.42	6.83	1.59
28	11.77	5.67	6.1
29	11.46	9.77	1.7
30	12.4	10.66	1.74
31	13.84	12.15	1.69
32	9.9	8.78	1.13
33	10.9	7.4	3.5
34	9.33	6.82	2.51
35	32.32	22.96	9.36
36	22.48	14.19	8.29
37	11.9	7.01	4.89
38	15.74	13.1	2.65
39	19.4	12.17	7.23
40	26.04	14.69	11.35
41	3.22	2.1	1.12
42	4.56	3.17	1.39
43	3.94	3.6	0.34
44	23.38	17.81	5.57
45	21.6	16.45	5.15
46	30.14	19.28	10.86
47	22.46	17.87	4.59
48	7.79	5.95	1.85
49	38.9	16.68	22.21
50	23.46	9	14.45
51	8.63	5.79	2.85
52	2.44	2.37	0.08
53	4.73	4.3	0.44
54	12.56	11.68	0.88
55	6.18	4.89	1.29
56	6.71	5.38	1.33
57	9.75	6.41	3.34
58	8.03	6.76	1.27
59	10.03	6.78	3.25
60	12.46	9.63	2.83
61	23.72	19.3	4.42
62	18.11	16.14	1.96
63	26.24	17.49	8.75
